# Supplementary material for: Expression of neurofibromin 1 in colorectal cancer and cetuximab resistance
Source: PubMed Central journal article supplement — Oncol Rep. 2021 Nov 12;47(1):15. doi: 10.3892/or.2021.8226 (PMC8611403; doi:10.3892/or.2021.8226), 2021-11-12
Supplement: Supplementary_Data.pdf [file Supplementary_Data.pdf]

Figure S1. Experimental design of the present study. NF-1, neurofibromin; CRC, colorectal cancer.

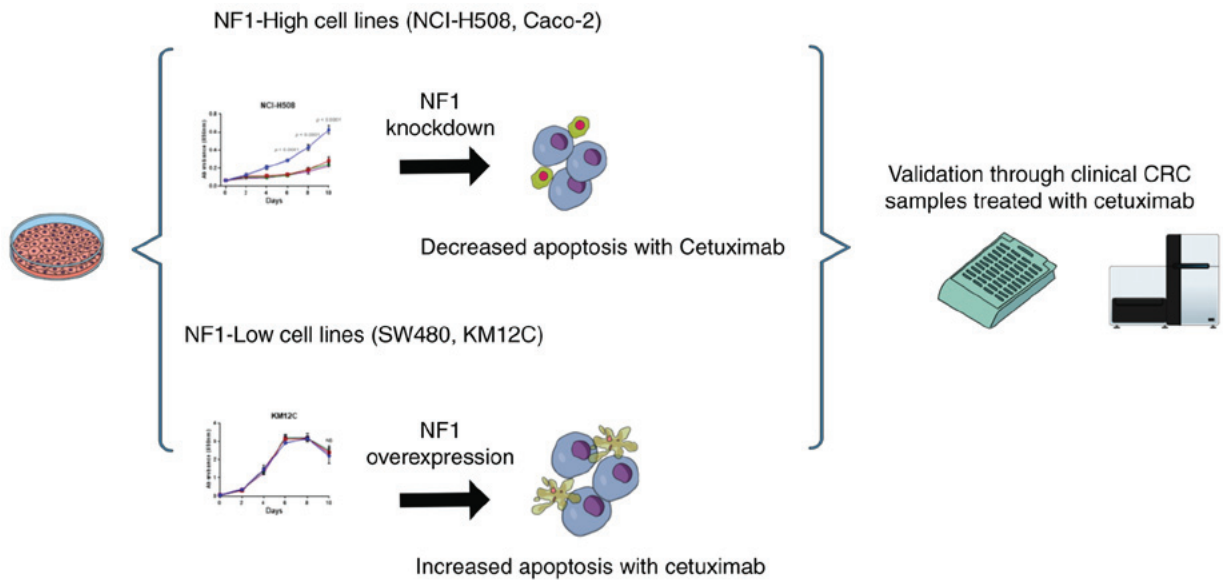

Figure S2. Estimated NF1 expression in the tumor samples. NF1 Fragments Per Kilobase of transcript per Million values according to sample acquisition site, stage at diagnosis, primary tumor site and the line of treatment. dx, diagnosis.

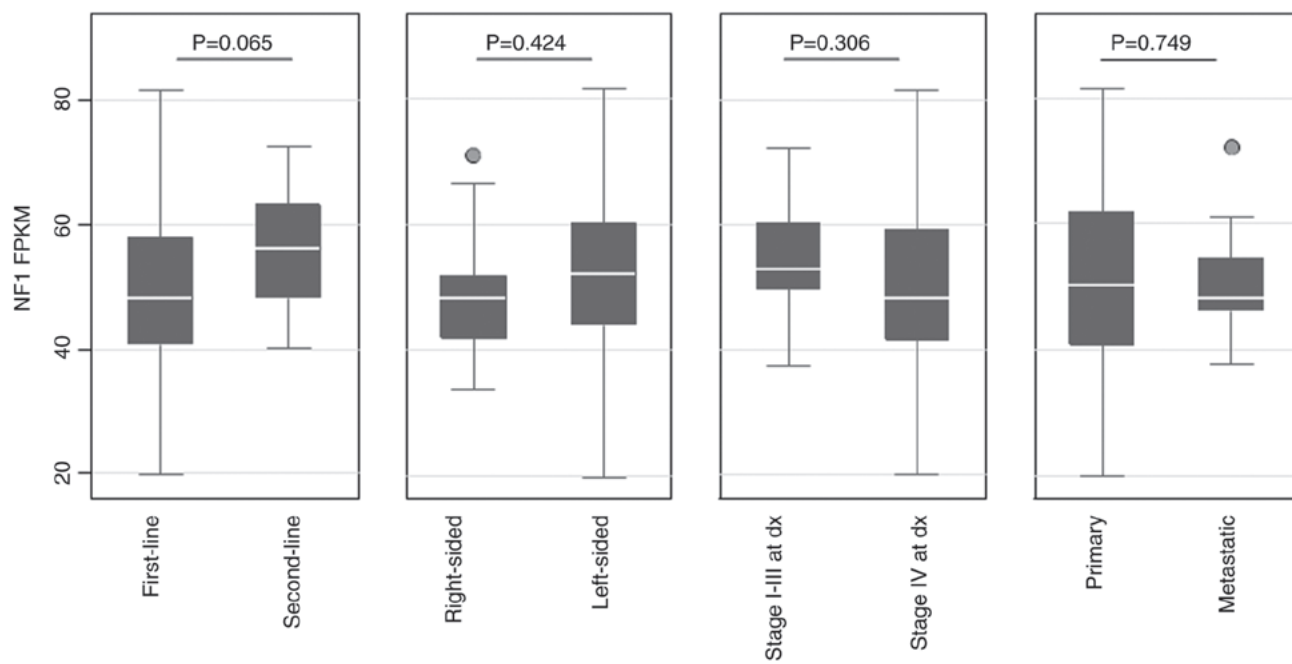

Table SI. Quality of samples submitted for RNA sequencing.

| Sample ID | Library ID           | Library type      | Concentration<br>( $\mu\text{g}/\mu\text{l}$ ) | Concentration<br>(nM) | Size (bp) | Result |
|-----------|----------------------|-------------------|------------------------------------------------|-----------------------|-----------|--------|
| 18R175    | 18R175_0011_41338148 | TruSeq RNA access | 9.26                                           | 53.16                 | 268       | Pass   |
| 18R176    | 18R176_0020_46008271 | TruSeq RNA access | 6.63                                           | 37.52                 | 272       | Pass   |
| 18R177    | 18R177_0021_46800206 | TruSeq RNA access | 5.77                                           | 32.5                  | 273       | Pass   |
| 18R178    | 18R178_0022_46750091 | TruSeq RNA access | 4.36                                           | 25.6                  | 262       | Pass   |
| 18R179    | 18R179_0023_45349791 | TruSeq RNA access | 4.46                                           | 25.49                 | 269       | Pass   |
| 18R294    | 18R294_0001_40759355 | TruSeq RNA access | 1.3                                            | 7.44                  | 268       | Pass   |
| 18R295    | 18R295_0003_41338148 | TruSeq RNA access | 0.79                                           | 4.66                  | 262       | Fail   |
| 18R296    | 18R296_0008_41897197 | TruSeq RNA access | 1.1                                            | 6.39                  | 264       | Pass   |
| 18R297    | 18R297_0009_40759355 | TruSeq RNA access | 0.45                                           | 2.53                  | 273       | Fail   |
| 18R298    | 18R298_0010_14863635 | TruSeq RNA access | 2.47                                           | 14.42                 | 263       | Pass   |
| 18R299    | 18R299_0025_47345928 | TruSeq RNA access | 5.51                                           | 31.64                 | 268       | Pass   |
| 18R300    | 18R300_0027_47642434 | TruSeq RNA access | 5.7                                            | 33.35                 | 263       | Pass   |
| 18R301    | 18R301_0002_48218872 | TruSeq RNA access | 4.72                                           | 27.1                  | 268       | Pass   |
| 18R302    | 18R302_0004_48434852 | TruSeq RNA access | 7.17                                           | 40.84                 | 270       | Pass   |
| 18R318    | 18R318_0005_45349791 | TruSeq RNA access | 2.42                                           | 13.47                 | 276       | Pass   |
| 18R304    | 18R304_0006_47345928 | TruSeq RNA access | 2.25                                           | 12.46                 | 278       | Pass   |
| 18R305    | 18R305_0007_14863635 | TruSeq RNA access | 1.56                                           | 8.95                  | 269       | Pass   |
| 18R306    | 18R306_0012_48434852 | TruSeq RNA access | 1.41                                           | 8.03                  | 270       | Pass   |
| 18R307    | 18R307_0013_49456451 | TruSeq RNA access | 7.79                                           | 43.26                 | 277       | Pass   |
| 18R319    | 18R319_0014_50587526 | TruSeq RNA access | 7.12                                           | 40.26                 | 272       | Pass   |
| 18R309    | 18R309_0015_49456451 | TruSeq RNA access | 6.7                                            | 36.7                  | 281       | Pass   |
| 18R310    | 18R310_0016_47642434 | TruSeq RNA access | 5.12                                           | 29.18                 | 270       | Pass   |
| 18R311    | 18R311_0018_50587526 | TruSeq RNA access | 3.87                                           | 20.97                 | 284       | Pass   |
| 18R421    | 18R421_001_41995161  | TruSeq RNA access | 3.89                                           | 22.24                 | 269       | Pass   |
| 18R423    | 18R423_003_40232780  | TruSeq RNA access | 6.15                                           | 35.99                 | 263       | Pass   |
| 18R426    | 18R426_006_45932744  | TruSeq RNA access | 5.89                                           | 33.43                 | 271       | Pass   |
| 18R427    | 18R427_007_47308099  | TruSeq RNA access | 7.9                                            | 44.86                 | 271       | Pass   |
| 18R428    | 18R428_08_46417008   | TruSeq RNA access | 6.16                                           | 35.5                  | 267       | Pass   |
| 18R429    | 18R429_09_11712574   | TruSeq RNA access | 7.37                                           | 42.46                 | 267       | Pass   |
| 18R430    | 18R430_010_44458964  | TruSeq RNA access | 5.05                                           | 30.26                 | 257       | Pass   |
| 18R432    | 18R432_012_48852948  | TruSeq RNA access | 9.14                                           | 53.25                 | 264       | Pass   |
| 18R433    | 18R433_013_49075782  | TruSeq RNA access | 6.26                                           | 35.43                 | 272       | Pass   |
| 18R434    | 18R434_014_49432138  | TruSeq RNA access | 9.8                                            | 54.42                 | 277       | Pass   |
| 18R435    | 18R435_015_49643363  | TruSeq RNA access | 7.67                                           | 41.97                 | 281       | Pass   |
| 18R436    | 18R436_016_29566772  | TruSeq RNA access | 8.6                                            | 49.72                 | 266       | Pass   |
| 18R437    | 18R437_018_50181151  | TruSeq RNA access | 6.06                                           | 35.18                 | 265       | Pass   |
| 18R438    | 18R438_019_50530171  | TruSeq RNA access | 7.32                                           | 41.57                 | 271       | Pass   |
| 18R440    | 18R440_020_50602247  | TruSeq RNA access | 8.5                                            | 49.56                 | 264       | Pass   |
| 18R442    | 18R442_021_18517345  | TruSeq RNA access | 7.05                                           | 41.11                 | 264       | Pass   |
| 18R443    | 18R443_022_17875226  | TruSeq RNA access | 7.3                                            | 40.42                 | 278       | Pass   |
| 18R457    | 18R457_023_51211769  | TruSeq RNA access | 7.95                                           | 42.9                  | 285       | Pass   |
| 18R458    | 18R458_025_51283384  | TruSeq RNA access | 11.64                                          | 63.48                 | 282       | Pass   |
| 18R459    | 18R459_027_51287920  | TruSeq RNA access | 10.93                                          | 59.82                 | 281       | Pass   |
| 18R460    | 18R460_01_51483533   | TruSeq RNA access | 7.23                                           | 40.14                 | 277       | Pass   |
| 18R461    | 18R461_02_51508812   | TruSeq RNA access | 10.62                                          | 58.38                 | 280       | Pass   |
| 18R462    | 18R462_03_51559733   | TruSeq RNA access | 10.84                                          | 60.87                 | 274       | Pass   |
| 18R463    | 18R463_04_45840117   | TruSeq RNA access | 8.54                                           | 47.45                 | 277       | Pass   |
| 18R464    | 18R464_05_51589518   | TruSeq RNA access | 8.29                                           | 44.15                 | 289       | Pass   |
| 18R465    | 18R465_06_51509435   | TruSeq RNA access | 5.58                                           | 32.13                 | 267       | Pass   |
| 18R466    | 18R466_07_39380160   | TruSeq RNA access | 9.99                                           | 54.67                 | 281       | Pass   |
| 18R467    | 18R467_08_51775302   | TruSeq RNA access | 9.93                                           | 54.73                 | 279       | Pass   |
| 18R468    | 18R468_09_52576072   | TruSeq RNA access | 12.85                                          | 69.37                 | 285       | Pass   |
| 18R469    | 18R469_010_52791028  | TruSeq RNA access | 9.35                                           | 53.1                  | 271       | Pass   |
| 18R470    | 18R470_011_52842801  | TruSeq RNA access | 11.36                                          | 64.04                 | 273       | Pass   |
| 18R471    | 18R471_012_52958148  | TruSeq RNA access | 8.01                                           | 43.69                 | 282       | Pass   |
| 18R472    | 18R472_013_45861758  | TruSeq RNA access | 6.66                                           | 36.21                 | 283       | Pass   |
| 18R473    | 18R473_014_53010544  | TruSeq RNA access | 8.72                                           | 45.18                 | 297       | Pass   |
| 18R474    | 18R474_015_53054056  | TruSeq RNA access | 9.11                                           | 50.4                  | 278       | Pass   |

Table SI. Continued.

| Sample ID | Library ID          | Library type      | Concentration<br>( $\mu\text{g}/\mu\text{l}$ ) | Concentration<br>(nM) | Size (bp) | Result |
|-----------|---------------------|-------------------|------------------------------------------------|-----------------------|-----------|--------|
| 18R471    | 18R471_012_52958148 | TruSeq RNA access | 8.01                                           | 43.69                 | 282       | Pass   |
| 18R472    | 18R472_013_45861758 | TruSeq RNA access | 6.66                                           | 36.21                 | 283       | Pass   |
| 18R473    | 18R473_014_53010544 | TruSeq RNA access | 8.72                                           | 45.18                 | 297       | Pass   |
| 18R474    | 18R474_015_53054056 | TruSeq RNA access | 9.11                                           | 50.4                  | 278       | Pass   |
| 18R475    | 18R475_016_53186681 | TruSeq RNA access | 10.99                                          | 58.73                 | 288       | Pass   |
| 18R476    | 18R476_018_53202165 | TruSeq RNA access | 7.94                                           | 44.44                 | 275       | Pass   |
| 18R477    | 18R477_019_53563916 | TruSeq RNA access | 8.22                                           | 45.83                 | 276       | Pass   |
| 18R478    | 18R478_020_53749190 | TruSeq RNA access | 9.25                                           | 52.32                 | 272       | Pass   |
| 18R479    | 18R479_021_53839512 | TruSeq RNA access | 7.17                                           | 40.72                 | 271       | Pass   |
| 18R480    | 18R480_022_53883324 | TruSeq RNA access | 8.76                                           | 49.37                 | 273       | Pass   |
| 18R507    | 18R507_004_42623786 | TruSeq RNA access | 4.17                                           | 25.25                 | 254       | Pass   |
| 18R508    | 18R508_011_48483102 | TruSeq RNA access | 3.68                                           | 22.18                 | 255       | Pass   |
| 18R449    | 18R449_023_50492510 | TruSeq RNA access | 4.48                                           | 25.42                 | 271       | Pass   |
| 18R454    | 18R454_027_51043454 | TruSeq RNA access | 7.93                                           | 44.85                 | 272       | Pass   |
| 18R455    | 18R455_01_49432138  | TruSeq RNA access | 11.76                                          | 63.05                 | 287       | Pass   |
| 18R456    | 18R456_02_51157593  | TruSeq RNA access | 5.46                                           | 30.75                 | 273       | Pass   |
| 18R673    | 18R673_05_49293333  | TruSeq RNA access | 18.59                                          | 100                   | 286       | Pass   |
| 18R696    | 18R696_04_51886411  | TruSeq RNA access | 9.47                                           | 51.85                 | 281       | Pass   |
| 18R700    | 18R700_08_52405884  | TruSeq RNA access | 11.3                                           | 62.31                 | 279       | Pass   |
| 18R695    | 18R695_03_51886411  | TruSeq RNA access | 17.28                                          | 95.29                 | 279       | Pass   |
| 18R674    | 18R674_06_49823486  | TruSeq RNA access | 5.54                                           | 31.94                 | 267       | Pass   |
| 18R699    | 18R699_07_52405884  | TruSeq RNA access | 19.72                                          | 104.6                 | 290       | Pass   |
| 18R705    | 18R705_013_54196465 | TruSeq RNA access | 15.51                                          | 75.49                 | 316       | Pass   |
| 18R649    | 18R649_010_37507130 | TruSeq RNA access | 16.59                                          | 93.48                 | 273       | Pass   |
| 18R646    | 18R646_007_27383678 | TruSeq RNA access | 15.24                                          | 87.84                 | 267       | Pass   |
| 18R664    | 18R664_01_48596185  | TruSeq RNA access | 13.3                                           | 71.81                 | 285       | Pass   |
| 18R678    | 18R678_010_50370696 | TruSeq RNA access | 10.38                                          | 58.26                 | 274       | Pass   |
| 18R682    | 18R682_014_50881994 | TruSeq RNA access | 14.7                                           | 79.63                 | 284       | Pass   |
| 18R702    | 18R702_010_53921194 | TruSeq RNA access | 22.33                                          | 118.89                | 289       | Pass   |
| 18R690    | 18R690_023_51341204 | TruSeq RNA access | 15.83                                          | 83.98                 | 290       | Pass   |
| 18R653    | 18R653_014_46669429 | TruSeq RNA access | 14.18                                          | 75.49                 | 289       | Pass   |
| 18R669    | 18R669_01_48888682  | TruSeq RNA access | 11.22                                          | 62.77                 | 275       | Pass   |
| 18R701    | 18R701_09_53540519  | TruSeq RNA access | 21.3                                           | 114.57                | 286       | Pass   |
| 18R675    | 18R675_07_49823486  | TruSeq RNA access | 10.38                                          | 57.05                 | 280       | Pass   |
| 18R654    | 18R654_015_46917825 | TruSeq RNA access | 14.15                                          | 75.31                 | 289       | Pass   |
| 18R647    | 18R647_08_33979067  | TruSeq RNA access | 8.48                                           | 47.29                 | 276       | Pass   |
| 18R694    | 18R694_02_51857583  | TruSeq RNA access | 14.37                                          | 78.38                 | 282       | Pass   |
| 18R651    | 18R651_012_43643024 | TruSeq RNA access | 17.85                                          | 97.7                  | 281       | Pass   |
| 18R641    | 18R641_002_17572109 | TruSeq RNA access | 7.85                                           | 43.27                 | 279       | Pass   |
| 18R663    | 18R663_027_48580957 | TruSeq RNA access | 10.59                                          | 59.89                 | 272       | Pass   |
| 18R659    | 18R659_020_47994630 | TruSeq RNA access | 9.06                                           | 49.78                 | 280       | Pass   |
| 18R645    | 18R645_006_21571732 | TruSeq RNA access | 7.88                                           | 44.72                 | 271       | Pass   |
| 18R661    | 18R661_021_48205403 | TruSeq RNA access | 14.27                                          | 78.39                 | 280       | Pass   |
| 18R689    | 18R689_022_51341204 | TruSeq RNA access | 8.56                                           | 48.76                 | 270       | Pass   |
| 18R697    | 18R697_05_52363036  | TruSeq RNA access | 19.44                                          | 106.07                | 282       | Pass   |
| 18R642    | 18R642_003_17843584 | TruSeq RNA access | 13.62                                          | 75.94                 | 276       | Pass   |
| 18R670    | 18R670_02_48992947  | TruSeq RNA access | 13.48                                          | 74.05                 | 280       | Pass   |
| 18R688    | 18R688_021_51175995 | TruSeq RNA access | 5.56                                           | 30.35                 | 282       | Pass   |
| 18R677    | 18R677_09_50204218  | TruSeq RNA access | 4.66                                           | 24.47                 | 293       | Pass   |
| 18R655    | 18R655_016_46917825 | TruSeq RNA access | 5.84                                           | 33.39                 | 269       | Pass   |
| 18R656    | 18R656_018_47296747 | TruSeq RNA access | 2.99                                           | 17.27                 | 266       | Pass   |
| 18R665    | 18R665_02_48596185  | TruSeq RNA access | 3.43                                           | 19.9                  | 265       | Pass   |
| 18R648    | 18R648_09_33979067  | TruSeq RNA access | 2.62                                           | 15.17                 | 266       | Pass   |
| 18R640    | 18R640_001_17572109 | TruSeq RNA access | 9.17                                           | 49.7                  | 284       | Pass   |
| 18R683    | 18R683_015_50977794 | TruSeq RNA access | 10.12                                          | 54.05                 | 288       | Pass   |
| 18R657    | 18R657_019_47296747 | TruSeq RNA access | 5.33                                           | 28.99                 | 283       | Pass   |
| 18R684    | 18R684_016_50977794 | TruSeq RNA access | 9.88                                           | 52.07                 | 292       | Pass   |
| 18R671    | 18R671_03_48992947  | TruSeq RNA access | 5.75                                           | 32.91                 | 269       | Pass   |
| 18R685    | 18R685_018_51038902 | TruSeq RNA access | 1.62                                           | 9.59                  | 260       | Pass   |

Table SII. Gene set enrichment analysis for RNA sequencing data from the tumor samples taken from cetuximab-treated patients with metastatic colorectal cancer.

| A, Pre-cetuximab vs. post-cetuximab (n=111)              |                                           |                  |            |           |                                       |           |
|----------------------------------------------------------|-------------------------------------------|------------------|------------|-----------|---------------------------------------|-----------|
| Kyoto Encyclopedia of Genes and Genomes pathway entry ID | Pathway description                       | Enrichment Score | NES        | P-value   | False discovery rate-adjusted P-value | Q-value   |
| hsa01521                                                 | EGFR tyrosine kinase inhibitor resistance | -0.2992677       | -1.0123052 | 0.4234973 | 0.7358541                             | 0.5645651 |
| hsa04014                                                 | Ras signaling pathway                     | -0.2515787       | -0.988775  | 0.4494774 | 0.737659                              | 0.5659498 |
| hsa04010                                                 | MAPK signaling pathway                    | -0.2265855       | -0.9079595 | 0.7538462 | 0.9648106                             | 0.740226  |
| B, Within post-cetuximab samples, PD vs. non-PD (n=36)   |                                           |                  |            |           |                                       |           |
| Kyoto Encyclopedia of Genes and Genomes pathway entry ID | Pathway description                       | Enrichment Score | NES        | P-value   | False discovery rate-adjusted P-value | Q-value   |
| hsa01521                                                 | EGFR tyrosine kinase inhibitor resistance | -0.2602811       | -0.8329476 | 0.7782486 | 1                                     | 0.9145312 |
| hsa04014                                                 | Ras signaling pathway                     | -0.2730942       | -0.987846  | 0.4987893 | 1                                     | 0.9145312 |
| hsa04010                                                 | MAPK signaling pathway                    | -0.1952221       | -0.7192921 | 0.9976526 | 1                                     | 0.9145312 |

ID, identifier; NES, normalized enrichment score; PD, progressive disease.

Table SIII. NF1-truncating mutations detected in the 1,449 study patients with metastatic colorectal cancer.

| Study ID | Gene | Variant type      | Protein change | Allele frequency |
|----------|------|-------------------|----------------|------------------|
| CRC-323  | NF1  | Frame_Shift_Ins   | T32Nfs*6       | 0.32             |
| CRC-1114 | NF1  | Frame_Shift_Ins   | L2395Ffs*27    | 0.15             |
| CRC-1114 | NF1  | Nonsense_Mutation | R1968*         | 0.13             |
| CRC-1273 | NF1  | Frame_Shift_Del   | F468Lfs*5      | 0.62             |
| CRC-1273 | NF1  | Nonsense_Mutation | S1053*         | 0.35             |
| CRC-1259 | NF1  | Nonsense_Mutation | Q576*          | 0.26             |
| CRC-1180 | NF1  | Nonsense_Mutation | W696*          | 0.29             |
| CRC-479  | NF1  | Splice_Site       | X464_splice    | 0.17             |
| CRC-1024 | NF1  | Nonsense_Mutation | K248*          | 0.45             |
| CRC-1274 | NF1  | Nonsense_Mutation | R2450*         | 0.09             |
| CRC-343  | NF1  | Frame_Shift_Del   | Q1010Kfs*2     | 0.14             |
| CRC-1275 | NF1  | Frame_Shift_Del   | D1849Mfs*14    | 0.26             |
| CRC-529  | NF1  | Splice_Site       | X2441_splice   | 0.08             |
| CRC-535  | NF1  | Nonsense_Mutation | R1769*         | 0.26             |
| CRC-305  | NF1  | Splice_Site       | X1371_splice   | 0.35             |
| CRC-264  | NF1  | Nonsense_Mutation | R2258*         | 0.15             |
| CRC-391  | NF1  | Nonsense_Mutation | R1769*         | 0.16             |
| CRC-391  | NF1  | Nonsense_Mutation | E1423*         | 0.21             |
| CRC-1015 | NF1  | Nonsense_Mutation | R1241*         | 0.33             |
| CRC-864  | NF1  | Splice_Site       | X1757_splice   | 0.62             |
| CRC-942  | NF1  | Nonsense_Mutation | R1968*         | 0.13             |
| CRC-1276 | NF1  | Frame_Shift_Del   | S2687Cfs*5     | 0.66             |
| CRC-1157 | NF1  | Frame_Shift_Ins   | F944Lfs*3      | 0.18             |
| CRC-1213 | NF1  | Frame_Shift_Del   | Y2285Tfs*5     | 0.6              |
| CRC-1164 | NF1  | Nonsense_Mutation | T1770Sfs*3     | 0.09             |
| CRC-1277 | NF1  | Splice_Site       | X2441_splice   | 0.18             |
| CRC-1278 | NF1  | Frame_Shift_Ins   | L1147Gfs*49    | 0.43             |
| CRC-1279 | NF1  | Frame_Shift_Ins   | Y580Lfs*8      | 0.69             |
| CRC-1280 | NF1  | Nonsense_Mutation | E1583*         | 0.45             |

NF1, neurofibromin.
